# Supplementary material
Source: HighWire-hosted journal article supplement (http://www.cmaj.ca/highwire/filestream/73883/field_highwire_adjunct_files/1/190224-res-2-at.pdf)
Supplement: 190224-res-2-at.pdf [file 190224-res-2-at.pdf]

**APPENDIX 2 (as supplied by the authors): CODING TREE**

| <b>Theme</b>                            | <b>Subthemes</b>   | <b>Codes</b>                                                                                                                                                                                                                                                                                                                                    |
|-----------------------------------------|--------------------|-------------------------------------------------------------------------------------------------------------------------------------------------------------------------------------------------------------------------------------------------------------------------------------------------------------------------------------------------|
| <i>Deliberately Planning Families</i>   | Communication      | STIs / POLY difficulties / Relationship quality / Relationship Satisfaction / Safe words / Disclosure to Partners-Potential Partners                                                                                                                                                                                                            |
|                                         | Pregnancy - Common | Preg Physical / Preg Mental Health / Preg Loss / Healthy Preg / Preg                                                                                                                                                                                                                                                                            |
|                                         | Birth - Common     | Natural birth / Water birth / Premature / PPH / Uterotonic / VBAC / C/S / Epidural / Intervention / Augmentation / Induction / Prior Preg & Birth                                                                                                                                                                                               |
|                                         | Family Planning    | Pregnancy Timing / Surrogacy / Paternity / Insemination / Fertility / Conception / Contraception / Choice of Bio-Parent / Pre-Preg                                                                                                                                                                                                              |
| <i>More is More</i>                     | Support            | Partner during birth / Labor support / PP mental health / PP physical / Partner support / Social support / Partner role / Breastfeeding / PP Infant / PP care / Extended Family Location / Positive Polyamory / POLY benefits / Doula / Non-birther birthing experience                                                                         |
|                                         | Time of Transition | Impact of preg on relationship / Transition / Plans & Intentions / Uninvolved partner / Parenting / Relationship dissolution / Parenting disinterest / Communication with children                                                                                                                                                              |
| <i>Presenting Poly</i>                  | Identity           | Gender / Queer / Sexual Orientation / Parent Labels / Race / Polyamory prompting / Polyamory as a phase / Poly Identity / Stereotype / Accurately representing polyamory / Social Justice / Burden of Disclosure / Coming Out / Passing / Cheating Comparison / Disclosure Family-Friend / Disclosure work / Disclosure Public / Disclosure HCP |
|                                         | HCP Disclosure     | Charting / Repeated Disclosure / Cost Benefit / Relevance-Irrelevance / Intake / Medically Necessary Disclosure                                                                                                                                                                                                                                 |
| <i>Living in a Mono-normative World</i> | Barriers           | Family Centred Care / Partner Acknowledgement / Intake Forms / Birth Physical Space / Room Capacity / Physical Isolation / Partner Labels / Recognition /                                                                                                                                                                                       |
|                                         | Systems            | Travel / Information Sharing / Finances / Legal / Child Services / Medical Decision Making / Marijuana Use                                                                                                                                                                                                                                      |

Appendix to: Arseneau E, Landry S, Darling EK. The Polyamorous Childbearing and Birth Experiences Study (POLYBABES): a qualitative study of the health care experiences of polyamorous families during pregnancy and birth. *CMAJ* 2019. doi: 10.1503/cmaj.190224.

Copyright © 2019 The Author(s) or their employer(s).

To receive this resource in an accessible format, please contact us at [cmajgroup@cmaj.ca](mailto:cmajgroup@cmaj.ca).

| Theme                                                                                             | Subthemes                     | Codes                                                                                                                                                                                                                                                                                      |
|---------------------------------------------------------------------------------------------------|-------------------------------|--------------------------------------------------------------------------------------------------------------------------------------------------------------------------------------------------------------------------------------------------------------------------------------------|
| <p><i>Intersecting Subthemes</i></p> <p><i>(Appeared in some or all 4 overarching themes)</i></p> | <p>Relationship Structure</p> | <p>Language / Relationship hierarchy (Primary, Secondary) / Non-hierarchical POLY / Triad / Kitchen-table POLY / Alternative family structure / Monogamish / Meta / Group marriage / Poly rules / Family Unit / Nesting / POLY History / Previous relationship</p>                         |
|                                                                                                   | <p>HCP Experiences</p>        | <p>Assumptions / Choice / Choice of Provider / Midwives / Informed Choice / Planned Provider / Advocacy / Shift Change / Hospital Staff / Positive HCP / Education / HCP Expectations / HCP Issues / Midwives Open-Minded / Medicalized Midwifery / Client Education / Future Preg HCP</p> |

ABBREVIATIONS: PP (postpartum), Preg (pregnancy), POLY (polyamory), STIs (Sexually Transmitted Infections), HCP (Health Care Provider), PPH (postpartum hemorrhage), VBAC (Vaginal Birth After Caesarean), C/S (Caesarean Section)
